# Supplementary material
Source: MDPI journal article supplement (https://www.mdpi.com/2073-4441/14/12/1948)
Supplement: s1 [file s1]

# Geochemical drivers of bacterial community diversity in watershed sediments of Heihe River (Zhangye City; Northern China)

Federica Piergiacomo, Luigimaria Borruso, Alfonso Esposito, Stefan Zerbe, Lorenzo Brusetti

Faculty of Science and Technology, Free University of Bozen-Bolzano, piazza Università 5, 39100 Bolzano, Italy.

Corresponding author: L. Brusetti. E-mail: lorenzo.brusetti@unibz.it

## 1. Results and Discussion

Table S1. Pearson co-correlation plot (2%) showing the response of bacterial taxonomy according to the concentrations and spreading of nutrients / pH/metals, but also taxa dynamics (inhibition or induction effects) induced by taxa themselves.

| Metals/Nutrients/Taxa | Taxa                                   | correlation  | P value     |
|-----------------------|----------------------------------------|--------------|-------------|
| N                     | <i>H16</i>                             | -0.58158751  | 0.014329716 |
| N                     | <i>Bacteroides</i>                     | 0.618336192  | 0.008150522 |
| N                     | <i>Blvii28 wastewater-sludge group</i> | -0.51868385  | 0.032901842 |
| N                     | <i>Sideroxydans</i>                    | -0.615467392 | 0.008538163 |
| N                     | <i>Sulfuritalea</i>                    | -0.557535333 | 0.020054385 |
| N                     | <i>Sulfuricurvum</i>                   | 0.651708585  | 0.004589379 |
| P                     | <i>H16</i>                             | -0.610082777 | 0.009305454 |
| P                     | <i>Bacteroides</i>                     | 0.653844395  | 0.004413716 |
| P                     | <i>Ferritrophicum</i>                  | -0.508296369 | 0.037220288 |
| P                     | <i>Sideroxydans</i>                    | -0.634041459 | 0.006270207 |
| P                     | <i>Christensenellaceae R-7 group</i>   | 0.502156296  | 0.03996827  |
| P                     | <i>Sulfuritalea</i>                    | -0.697276101 | 0.001863115 |
| P                     | <i>Candidatus Accumulibacter</i>       | -0.567137058 | 0.017587324 |
| P                     | <i>Thiobacillus</i>                    | -0.483907072 | 0.049048214 |
| P                     | <i>Sulfuricurvum</i>                   | 0.598802011  | 0.011091173 |
| pH                    | <i>Anaerolinea</i>                     | 0.544921654  | 0.023696517 |
| pH                    | <i>Opitutus</i>                        | 0.537315767  | 0.026128485 |
| Fe                    | <i>Gelria</i>                          | 0.531778045  | 0.028017272 |

|    |                                              |              |             |
|----|----------------------------------------------|--------------|-------------|
| Fe | <i>Syntrophus</i>                            | 0.526757377  | 0.029819108 |
| Fe | <i>Ferritrophicum</i>                        | -0.545869756 | 0.023406125 |
| Fe | <i>Erysipelothrix</i>                        | -0.597085957 | 0.011385142 |
| Fe | <i>Sideroxydans</i>                          | -0.547311776 | 0.022969756 |
| Fe | <i>Sulfuritalea</i>                          | -0.486389716 | 0.047729625 |
| Al | <i>Rhodobacter</i>                           | -0.486456784 | 0.047694378 |
| Al | <i>Gelria</i>                                | 0.584179018  | 0.013799554 |
| Al | <i>Syntrophus</i>                            | 0.654081209  | 0.004394579 |
| Al | <i>Ferritrophicum</i>                        | -0.540341247 | 0.025139022 |
| Al | <i>Sideroxydans</i>                          | -0.605106227 | 0.01006256  |
| Al | <i>Zoogloea</i>                              | -0.545385431 | 0.023554121 |
| Al | <i>Sulfuritalea</i>                          | -0.612659184 | 0.008931747 |
| Al | <i>Candidatus Accumulibacter</i>             | -0.499851744 | 0.041038449 |
| Mn | <i>H16</i>                                   | 0.540843845  | 0.024977499 |
| Mn | <i>Bacteroides</i>                           | -0.66863805  | 0.003340667 |
| Mn | <i>Sulfurimonas</i>                          | -0.531667136 | 0.028056146 |
| Mn | <i>[Desulfobacterium] catecholicum group</i> | 0.53671205   | 0.02632948  |
| Mn | <i>vadinBC27 wastewater-sludge group</i>     | -0.520283817 | 0.032272346 |
| Mn | <i>Geobacter</i>                             | 0.590033464  | 0.012658817 |
| Mn | <i>Anaerolinea</i>                           | 0.516530456  | 0.033763871 |
| Mn | <i>Thermomonas</i>                           | -0.56696399  | 0.017629576 |
| Mn | <i>Christensenellaceae R-7 group</i>         | -0.641043274 | 0.005553215 |
| Mn | <i>Trichococcus</i>                          | -0.715563017 | 0.001239037 |
| Mn | <i>Desulfobacter</i>                         | -0.517024526 | 0.033564579 |
| Mn | <i>Thauera</i>                               | -0.629941995 | 0.006723378 |
| Cu | <i>Gelria</i>                                | 0.612604219  | 0.008939593 |
| Cu | <i>Syntrophus</i>                            | 0.499274897  | 0.04130969  |
| Cu | <i>Zoogloea</i>                              | -0.664294859 | 0.003630875 |
| Cu | <i>Sulfuritalea</i>                          | -0.564440348 | 0.018254776 |
| Cu | <i>Candidatus Accumulibacter</i>             | -0.578592252 | 0.014962345 |

|    |                                              |              |             |
|----|----------------------------------------------|--------------|-------------|
| Cu | <i>Dechloromonas</i>                         | -0.529790121 | 0.028720377 |
| Cu | <i>Flavobacterium</i>                        | -0.561995628 | 0.018876845 |
| Zn | <i>Gelria</i>                                | 0.516080546  | 0.033946137 |
| Zn | <i>Microbacter</i>                           | -0.482498021 | 0.049808656 |
| Zn | <i>Flavobacterium</i>                        | -0.556523981 | 0.020329188 |
| Cr | <i>Lautropia</i>                             | 0.574282562  | 0.015910963 |
| Cr | <i>Syntrophus</i>                            | 0.573988655  | 0.015977337 |
| Cr | <i>Ferritrophicum</i>                        | -0.484199838 | 0.048891312 |
| Cr | <i>Sideroxydans</i>                          | -0.691468733 | 0.002108124 |
| Cr | <i>Anaerolinea</i>                           | -0.485402529 | 0.04825071  |
| Cr | <i>Opitutus</i>                              | -0.683307898 | 0.002496437 |
| Ni | <i>Lautropia</i>                             | 0.563600248  | 0.018466705 |
| Ni | <i>Syntrophus</i>                            | 0.657630064  | 0.004115749 |
| Ni | <i>Ferritrophicum</i>                        | -0.533373225 | 0.027462734 |
| Ni | <i>Sideroxydans</i>                          | -0.603328052 | 0.010344667 |
| Ni | <i>Sulfuritalea</i>                          | -0.496793753 | 0.042491866 |
| Pb | <i>Microbacter</i>                           | -0.491925424 | 0.044885631 |
| Pb | <i>Flavobacterium</i>                        | -0.624790641 | 0.007329731 |
| Co | <i>Syntrophus</i>                            | 0.534156142  | 0.027193683 |
| Co | <i>Zoogloea</i>                              | -0.52442812  | 0.030684694 |
| Hg | <i>Bacteroides</i>                           | 0.548462451  | 0.022626105 |
| Hg | <i>Treponema</i>                             | -0.579889636 | 0.014685679 |
| Hg | <i>[Desulfobacterium] catecholicum group</i> | -0.688136382 | 0.002260225 |
| Hg | <i>Erysipelothrix</i>                        | -0.524633926 | 0.030607445 |
| Hg | <i>Propionivibrio</i>                        | -0.640967006 | 0.005560652 |
| Hg | <i>Smithella</i>                             | 0.486498033  | 0.047672709 |
| Hg | <i>Desulfobulbus</i>                         | -0.668763284 | 0.003332588 |
| Hg | <i>Sulfuricurvum</i>                         | 0.688561079  | 0.002240355 |
| Cd | <i>Microbacter</i>                           | -0.507447495 | 0.037591373 |
| Cd | <i>Flavobacterium</i>                        | -0.570615063 | 0.016754907 |

|                                   |                                          |              |             |
|-----------------------------------|------------------------------------------|--------------|-------------|
| As                                | <i>Gelria</i>                            | 0.57909179   | 0.014855338 |
| As                                | <i>Actibacter</i>                        | -0.502804642 | 0.039671046 |
| As                                | <i>BD1-7 clade</i>                       | -0.589865653 | 0.01269044  |
| As                                | <i>Zoogloea</i>                          | -0.657620678 | 0.004116467 |
| As                                | <i>Candidatus Accumulibacter</i>         | -0.539020401 | 0.025567363 |
| As                                | <i>Dechloromonas</i>                     | -0.744792113 | 0.000603535 |
| As                                | <i>Flavobacterium</i>                    | -0.533804315 | 0.027314336 |
| <i>Cellvibrio</i>                 | <i>[Eubacterium] brachy group</i>        | -0.532834121 | 0.027649188 |
| <i>Cellvibrio</i>                 | <i>vadinBC27 wastewater-sludge group</i> | -0.665318089 | 0.003560727 |
| <i>Cellvibrio</i>                 | <i>Desulfocapsa</i>                      | -0.541503906 | 0.024766595 |
| <i>Cellvibrio</i>                 | <i>Smithella</i>                         | -0.522558735 | 0.031393238 |
| <i>Cellvibrio</i>                 | <i>Desulfobacter</i>                     | -0.517367145 | 0.033426907 |
| <i>Cellvibrio</i>                 | <i>Flavobacterium</i>                    | 0.552308712  | 0.021506332 |
| <i>Lautropia</i>                  | <i>Roseomonas</i>                        | 0.554994923  | 0.020750229 |
| <i>Lautropia</i>                  | <i>Syntrophus</i>                        | 0.496508445  | 0.042629429 |
| <i>Lautropia</i>                  | <i>Erysipelothrix</i>                    | -0.518150634 | 0.033113707 |
| <i>Lautropia</i>                  | <i>Actibacter</i>                        | 0.491262342  | 0.045219379 |
| <i>[Eubacterium] brachy group</i> | <i>Sulfurovum</i>                        | 0.504638203  | 0.03883956  |
| <i>[Eubacterium] brachy group</i> | <i>Gelria</i>                            | 0.531577722  | 0.028087517 |
| <i>[Eubacterium] brachy group</i> | <i>Leptolinea</i>                        | 0.566806903  | 0.017667996 |
| <i>[Eubacterium] brachy group</i> | <i>BSV13</i>                             | 0.546941055  | 0.023081331 |
| <i>[Eubacterium] brachy group</i> | <i>Smithella</i>                         | 0.500835566  | 0.040578961 |
| <i>[Eubacterium] brachy group</i> | <i>Desulfobacter</i>                     | 0.494929886  | 0.043396635 |
| <i>Sulfurovum</i>                 | <i>Hydrogenophaga</i>                    | 0.594274183  | 0.011880146 |
| <i>Sulfurovum</i>                 | <i>Sulfurimonas</i>                      | 0.527225253  | 0.029647526 |
| <i>Sulfurovum</i>                 | <i>Anaerovorax</i>                       | 0.620036556  | 0.007927493 |
| <i>Sulfurovum</i>                 | <i>vadinBC27 wastewater-sludge group</i> | 0.583239767  | 0.013989882 |
| <i>Hydrogenophaga</i>             | <i>Anaerovorax</i>                       | 0.583201784  | 0.013997623 |
| <i>Hydrogenophaga</i>             | <i>Actibacter</i>                        | -0.519782141 | 0.032468725 |
| <i>Hydrogenophaga</i>             | <i>Altererythrobacter</i>                | 0.625252904  | 0.007273592 |

|                       |                                              |              |             |
|-----------------------|----------------------------------------------|--------------|-------------|
| <i>Hydrogenophaga</i> | <i>Thermomonas</i>                           | 0.535664361  | 0.026681119 |
| <i>Hydrogenophaga</i> | <i>Christensenellaceae R-7 group</i>         | 0.5260686    | 0.030073087 |
| <i>Hydrogenophaga</i> | <i>Pseudomonas</i>                           | 0.485557512  | 0.048168621 |
| <i>Hydrogenophaga</i> | <i>Arenimonas</i>                            | 0.547459907  | 0.02292529  |
| <i>Rhodobacter</i>    | <i>Sulfurimonas</i>                          | 0.717129262  | 0.001194811 |
| <i>Rhodobacter</i>    | <i>Ferritrophicum</i>                        | 0.611972396  | 0.009030173 |
| <i>Rhodobacter</i>    | <i>Sideroxydans</i>                          | 0.523323692  | 0.031101798 |
| <i>Rhodobacter</i>    | <i>Sulfuritalea</i>                          | 0.589784018  | 0.012705846 |
| <i>Rhodobacter</i>    | <i>Arenimonas</i>                            | 0.514584903  | 0.034557458 |
| <i>Rhodobacter</i>    | <i>Desulfobacter</i>                         | 0.510065944  | 0.036455693 |
| <i>Rhodobacter</i>    | <i>Candidatus Accumulibacter</i>             | 0.569599527  | 0.016994697 |
| <i>Gelria</i>         | <i>Syntrophus</i>                            | 0.643855382  | 0.005284558 |
| <i>Gelria</i>         | <i>Geobacter</i>                             | 0.535472056  | 0.026746055 |
| <i>Gelria</i>         | <i>Leptolinea</i>                            | 0.526953461  | 0.029747106 |
| <i>Syntrophus</i>     | <i>Zoogloea</i>                              | -0.530558799 | 0.028446912 |
| <i>Syntrophus</i>     | <i>Leptolinea</i>                            | 0.540274462  | 0.025160545 |
| <i>H16</i>            | <i>Bacteroides</i>                           | -0.737634166 | 0.000725866 |
| <i>H16</i>            | <i>Treponema</i>                             | 0.728870377  | 0.000902943 |
| <i>H16</i>            | <i>[Desulfobacterium] catecholicum group</i> | 0.523550457  | 0.031015804 |
| <i>H16</i>            | <i>Massilia</i>                              | -0.524200054 | 0.030770472 |
| <i>H16</i>            | <i>Geobacter</i>                             | 0.560640022  | 0.019228857 |
| <i>H16</i>            | <i>Thermomonas</i>                           | -0.597713367 | 0.011276955 |
| <i>H16</i>            | <i>Desulfobulbus</i>                         | 0.494414305  | 0.043649463 |
| <i>H16</i>            | <i>Opitutus</i>                              | 0.567494184  | 0.017500387 |
| <i>H16</i>            | <i>Sulfuricurvum</i>                         | -0.661622877 | 0.00381936  |
| <i>Bacteroides</i>    | <i>Treponema</i>                             | -0.736374124 | 0.000749391 |
| <i>Bacteroides</i>    | <i>[Desulfobacterium] catecholicum group</i> | -0.542829927 | 0.024347072 |
| <i>Bacteroides</i>    | <i>Longilinea</i>                            | 0.505600595  | 0.038408468 |
| <i>Bacteroides</i>    | <i>Algoriphagus</i>                          | -0.507267222 | 0.037670541 |
| <i>Bacteroides</i>    | <i>Geobacter</i>                             | -0.530522448 | 0.028459799 |

|                                              |                                              |              |             |
|----------------------------------------------|----------------------------------------------|--------------|-------------|
| <i>Bacteroides</i>                           | <i>Desulfocapsa</i>                          | 0.583605185  | 0.01391559  |
| <i>Bacteroides</i>                           | <i>Christensenellaceae R-7 group</i>         | 0.551289588  | 0.021798736 |
| <i>Bacteroides</i>                           | <i>Smithella</i>                             | 0.654842549  | 0.004333509 |
| <i>Bacteroides</i>                           | <i>Trichococcus</i>                          | 0.725140985  | 0.000988425 |
| <i>Bacteroides</i>                           | <i>Desulfobacter</i>                         | 0.48804904   | 0.046863304 |
| <i>Bacteroides</i>                           | <i>Opitutus</i>                              | -0.643142832 | 0.005351618 |
| <i>Bacteroides</i>                           | <i>Thauera</i>                               | 0.48792089   | 0.046929785 |
| <i>Bacteroides</i>                           | <i>Sulfuricurvum</i>                         | 0.621401085  | 0.007752069 |
| <i>Sulfurimonas</i>                          | <i>Pseudomonas</i>                           | 0.486339589  | 0.047755982 |
| <i>Sulfurimonas</i>                          | <i>Trichococcus</i>                          | 0.526136452  | 0.030047994 |
| <i>Sulfurimonas</i>                          | <i>Arenimonas</i>                            | 0.772629409  | 0.00027726  |
| <i>Sulfurimonas</i>                          | <i>Desulfobacter</i>                         | 0.793119376  | 0.000145625 |
| <i>Sulfurimonas</i>                          | <i>Thiobacillus</i>                          | 0.524381469  | 0.030702225 |
| <i>Sulfurimonas</i>                          | <i>Thauera</i>                               | 0.771435668  | 0.000287281 |
| <i>Treponema</i>                             | <i>[Desulfobacterium] catecholicum group</i> | 0.542539025  | 0.024438632 |
| <i>Treponema</i>                             | <i>Altererythrobacter</i>                    | 0.567894811  | 0.017403262 |
| <i>Treponema</i>                             | <i>Microbacter</i>                           | -0.483628781 | 0.049197707 |
| <i>Treponema</i>                             | <i>Geobacter</i>                             | 0.723514546  | 0.001027743 |
| <i>Treponema</i>                             | <i>Propionivibrio</i>                        | 0.501481692  | 0.040279322 |
| <i>Treponema</i>                             | <i>Desulfocapsa</i>                          | -0.56636009  | 0.017777634 |
| <i>Treponema</i>                             | <i>Smithella</i>                             | -0.510113382 | 0.036435362 |
| <i>Treponema</i>                             | <i>Trichococcus</i>                          | -0.587812801 | 0.013082374 |
| <i>Treponema</i>                             | <i>Desulfobulbus</i>                         | 0.53773095   | 0.025990949 |
| <i>Treponema</i>                             | <i>Sulfuricurvum</i>                         | -0.615260464 | 0.008566684 |
| <i>[Desulfobacterium] catecholicum group</i> | <i>Algoriphagus</i>                          | 0.496655344  | 0.042558559 |
| <i>[Desulfobacterium] catecholicum group</i> | <i>Geobacter</i>                             | 0.59437549   | 0.01186202  |
| <i>[Desulfobacterium] catecholicum group</i> | <i>Desulfobulbus</i>                         | 0.598848951  | 0.011083217 |
| <i>Longilinea</i>                            | <i>vadinBC27 wastewater-sludge group</i>     | 0.547656917  | 0.022866256 |
| <i>Longilinea</i>                            | <i>Smithella</i>                             | 0.505515726  | 0.038446338 |
| <i>Longilinea</i>                            | <i>Trichococcus</i>                          | 0.523230101  | 0.031137343 |

|                                          |                                      |              |             |
|------------------------------------------|--------------------------------------|--------------|-------------|
| <i>Longilinea</i>                        | <i>Flavobacterium</i>                | -0.576927973 | 0.015323244 |
| <i>Massilia</i>                          | <i>BD1-7 clade</i>                   | 0.505603137  | 0.038407335 |
| <i>Massilia</i>                          | <i>Dechloromonas</i>                 | 0.569109277  | 0.017111414 |
| <i>Massilia</i>                          | <i>Sulfuricurvum</i>                 | 0.558242051  | 0.019864084 |
| <i>Ferritrophicum</i>                    | <i>Sideroxydans</i>                  | 0.778734351  | 0.000230457 |
| <i>Ferritrophicum</i>                    | <i>Zoogloea</i>                      | 0.483344354  | 0.04935085  |
| <i>Ferritrophicum</i>                    | <i>Propionivibrio</i>                | 0.567726341  | 0.017444052 |
| <i>Ferritrophicum</i>                    | <i>Sulfuritalea</i>                  | 0.698415876  | 0.001817887 |
| <i>Ferritrophicum</i>                    | <i>Candidatus Accumulibacter</i>     | 0.536598929  | 0.026367274 |
| <i>Erysipelothrix</i>                    | <i>Anaerovorax</i>                   | 0.495804128  | 0.04297046  |
| <i>Erysipelothrix</i>                    | <i>Actibacter</i>                    | -0.603531341 | 0.010312101 |
| <i>Erysipelothrix</i>                    | <i>Altererythrobacter</i>            | 0.492060083  | 0.04481808  |
| <i>Erysipelothrix</i>                    | <i>Sulfuricurvum</i>                 | -0.528489241 | 0.029187786 |
| <i>Anaerovorax</i>                       | <i>Actibacter</i>                    | -0.662662271 | 0.003745119 |
| <i>Anaerovorax</i>                       | <i>Christensenellaceae R-7 group</i> | 0.62725981   | 0.007033848 |
| <i>Actibacter</i>                        | <i>Christensenellaceae R-7 group</i> | -0.610967888 | 0.00917569  |
| <i>Sideroxydans</i>                      | <i>Sulfuritalea</i>                  | 0.604927586  | 0.010090622 |
| <i>Sideroxydans</i>                      | <i>Opitutus</i>                      | 0.554540571  | 0.02087664  |
| <i>Sideroxydans</i>                      | <i>Thiobacillus</i>                  | 0.515038621  | 0.034371126 |
| <i>Algoriphagus</i>                      | <i>Trichococcus</i>                  | -0.609955211 | 0.009324276 |
| <i>Altererythrobacter</i>                | <i>Geobacter</i>                     | 0.511916435  | 0.035669003 |
| <i>Microbacter</i>                       | <i>Paludibacter</i>                  | 0.519859558  | 0.032438361 |
| <i>Microbacter</i>                       | <i>BD1-7 clade</i>                   | 0.5744336    | 0.015876938 |
| <i>Microbacter</i>                       | <i>Thauera</i>                       | 0.551678932  | 0.021686664 |
| <i>Paludibacter</i>                      | <i>Christensenellaceae R-7 group</i> | 0.509045237  | 0.036895243 |
| <i>Paludibacter</i>                      | <i>Pseudomonas</i>                   | 0.682026437  | 0.0025624   |
| <i>Paludibacter</i>                      | <i>Arenimonas</i>                    | 0.597647418  | 0.011288288 |
| <i>Paludibacter</i>                      | <i>Desulfobacter</i>                 | 0.517115608  | 0.033527938 |
| <i>Paludibacter</i>                      | <i>Thauera</i>                       | 0.670688704  | 0.003210361 |
| <i>vadinBC27 wastewater-sludge group</i> | <i>Leptolinea</i>                    | 0.676378261  | 0.002870329 |

|                                          |                                      |              |             |
|------------------------------------------|--------------------------------------|--------------|-------------|
| <i>vadinBC27 wastewater-sludge group</i> | <i>Trichococcus</i>                  | 0.618591647  | 0.008116698 |
| <i>Brevundimonas</i>                     | <i>Pseudomonas</i>                   | 0.483093486  | 0.049486221 |
| <i>BD1-7 clade</i>                       | <i>Desulfocapsa</i>                  | 0.534866279  | 0.026951407 |
| <i>BD1-7 clade</i>                       | <i>Arenimonas</i>                    | 0.570551516  | 0.016769833 |
| <i>BD1-7 clade</i>                       | <i>Candidatus Accumulibacter</i>     | 0.646761587  | 0.005018032 |
| <i>BD1-7 clade</i>                       | <i>Dechloromonas</i>                 | 0.718804966  | 0.001148943 |
| <i>Geobacter</i>                         | <i>Thermomonas</i>                   | -0.515142579 | 0.034328541 |
| <i>Zoogloea</i>                          | <i>Anaerolinea</i>                   | -0.520602112 | 0.032148224 |
| <i>Zoogloea</i>                          | <i>Sulfuritalea</i>                  | 0.512390219  | 0.035469684 |
| <i>Zoogloea</i>                          | <i>Candidatus Accumulibacter</i>     | 0.567678775  | 0.017455583 |
| <i>Zoogloea</i>                          | <i>Dechloromonas</i>                 | 0.726215672  | 0.000963134 |
| <i>Propionivibrio</i>                    | <i>Desulfobulbus</i>                 | 0.598289738  | 0.011178289 |
| <i>Propionivibrio</i>                    | <i>Sulfuricurvum</i>                 | -0.712372456 | 0.00133331  |
| <i>Anaerolinea</i>                       | <i>Thermomonas</i>                   | -0.491900095 | 0.044898345 |
| <i>Anaerolinea</i>                       | <i>Flavobacterium</i>                | -0.551409611 | 0.02176414  |
| <i>Leptolinea</i>                        | <i>Smithella</i>                     | 0.665744263  | 0.003531837 |
| <i>Leptolinea</i>                        | <i>Desulfobacter</i>                 | 0.492575597  | 0.044560187 |
| <i>Leptolinea</i>                        | <i>Flavobacterium</i>                | -0.630817728 | 0.006624428 |
| <i>Desulfocapsa</i>                      | <i>Smithella</i>                     | 0.643852259  | 0.00528485  |
| <i>Desulfocapsa</i>                      | <i>Trichococcus</i>                  | 0.515797506  | 0.034061186 |
| <i>Desulfocapsa</i>                      | <i>Sulfuricurvum</i>                 | 0.578870317  | 0.014902705 |
| <i>Thermomonas</i>                       | <i>Christensenellaceae R-7 group</i> | 0.487805643  | 0.046989633 |
| <i>Thermomonas</i>                       | <i>Pseudomonas</i>                   | 0.555983998  | 0.020477109 |
| <i>Thermomonas</i>                       | <i>Arenimonas</i>                    | 0.596892345  | 0.011418693 |
| <i>Thermomonas</i>                       | <i>Desulfobulbus</i>                 | -0.512910604 | 0.035251741 |
| <i>Thermomonas</i>                       | <i>Thauera</i>                       | 0.587888072  | 0.013067836 |
| <i>Thermomonas</i>                       | <i>Flavobacterium</i>                | 0.569148907  | 0.017101956 |
| <i>Christensenellaceae R-7 group</i>     | <i>Pseudomonas</i>                   | 0.653462246  | 0.00444474  |
| <i>Christensenellaceae R-7 group</i>     | <i>Trichococcus</i>                  | 0.729293343  | 0.000893647 |
| <i>Christensenellaceae R-7 group</i>     | <i>Desulfobacter</i>                 | 0.618437014  | 0.008137159 |



|                                      |                                  |             |             |
|--------------------------------------|----------------------------------|-------------|-------------|
| <i>Christensenellaceae R-7 group</i> | <i>Thauera</i>                   | 0.701714455 | 0.001692044 |
| <i>Pseudomonas</i>                   | <i>Arenimonas</i>                | 0.776766757 | 0.000244758 |
| <i>Pseudomonas</i>                   | <i>Thauera</i>                   | 0.744499132 | 0.000608182 |
| <i>Pseudomonas</i>                   | <i>Flavobacterium</i>            | 0.504225275 | 0.039025649 |
| <i>Sulfuritalea</i>                  | <i>Opitutus</i>                  | 0.677994815 | 0.002779271 |
| <i>Sulfuritalea</i>                  | <i>Dechloromonas</i>             | 0.646869238 | 0.005008372 |
| <i>Sulfuritalea</i>                  | <i>Thiobacillus</i>              | 0.799112874 | 0.000119017 |
| <i>Smithella</i>                     | <i>Trichococcus</i>              | 0.689881397 | 0.002179495 |
| <i>Smithella</i>                     | <i>Desulfobacter</i>             | 0.582978029 | 0.014043288 |
| <i>Smithella</i>                     | <i>Thauera</i>                   | 0.491248026 | 0.045226605 |
| <i>Trichococcus</i>                  | <i>Desulfobacter</i>             | 0.779842829 | 0.000222713 |
| <i>Trichococcus</i>                  | <i>Thauera</i>                   | 0.723386161 | 0.001030901 |
| <i>Arenimonas</i>                    | <i>Desulfobacter</i>             | 0.510130308 | 0.03642811  |
| <i>Arenimonas</i>                    | <i>Candidatus Accumulibacter</i> | 0.604722984 | 0.010122838 |
| <i>Arenimonas</i>                    | <i>Dechloromonas</i>             | 0.518642948 | 0.032918057 |
| <i>Arenimonas</i>                    | <i>Thiobacillus</i>              | 0.517572548 | 0.033344579 |
| <i>Arenimonas</i>                    | <i>Thauera</i>                   | 0.788796648 | 0.00016777  |
| <i>Arenimonas</i>                    | <i>Flavobacterium</i>            | 0.667169429 | 0.003436607 |
| <i>Desulfobulbus</i>                 | <i>Sulfuricurvum</i>             | -0.61132065 | 0.009124376 |
| <i>Candidatus Accumulibacter</i>     | <i>Opitutus</i>                  | 0.515787867 | 0.034065109 |
| <i>Candidatus Accumulibacter</i>     | <i>Thiobacillus</i>              | 0.692683829 | 0.002054793 |
| <i>Candidatus Accumulibacter</i>     | <i>Flavobacterium</i>            | 0.508702755 | 0.037043627 |
| <i>Opitutus</i>                      | <i>Thiobacillus</i>              | 0.656090607 | 0.004234886 |
| <i>Dechloromonas</i>                 | <i>Thiobacillus</i>              | 0.531166822 | 0.028232026 |

Table S2. Summary of the main outcomes.

| <b>Taxonomic group</b>                        | <b>Potential indicator service</b>                                              | <b>Further readings</b> | <b>Main detected geochemical drivers</b> |
|-----------------------------------------------|---------------------------------------------------------------------------------|-------------------------|------------------------------------------|
| <b><i>R. Eutropha H16 spp.</i></b>            | lithotropic soil and freshwater bacterium/ polyhydroxyalkanoates (PHA) producer | 1, 2                    | N, P                                     |
| <b><i>Sulfuricurvum spp.</i></b>              | sulfur-related anthropogenic compounds/petroleum pollution and degradation      | 3,4, 5,6                | N, P                                     |
| <b><i>Sulfuritalea /Sulfurimonas spp.</i></b> | sulfur oxidizers bacteria                                                       | 7                       | N, P, Hg, Mn, Cu                         |
| <b><i>Desulfobacter spp.</i></b>              | sulfate reducing bacteria                                                       | 8                       | Cu, Fe, Mn, Pb, Sb, Zn                   |
| <b><i>Synderoxidans spp.</i></b>              | freshwater Fe-oxidizing bacteria (FeOB)                                         | 9                       | N, P                                     |
| <b><i>Opitutus spp.</i></b>                   | <i>P. australis</i> rhixobacterial communities/ anaerobic nitrate reduction     | 10, 11                  | pH                                       |
| <b><i>Flavobacterium spp.</i></b>             | animals freshwater pathogen/ammonia, nitrite and metal removal                  | 12, 13, 14              | Cu, Zn, Pb, Cd, As                       |
| <b><i>Bacteroides spp.</i></b>                | sewage/ fecal pollution                                                         | 15,16,17                | N, P, Hg, Mn                             |
| <b><i>Gelria spp.</i></b>                     | sewage pollution/synthropic acetate oxidation                                   | 18,19                   | Al, Fe, Zn, Cu, As                       |
| <b><i>Syntrophus spp.</i></b>                 | sewage and industrial pollution/methane production                              | 20, 12                  | Al, Fe, Cr, Ni, Co                       |
| <b><i>Zooglea spp.</i></b>                    | sewage water/sediment pollution                                                 | 12, 21                  | Al, Cu, Co, As                           |
| <b><i>Anaerolinea spp.</i></b>                | sewage pollution/organic matter degradation                                     | 12, 22                  | pH                                       |

1. Poladyan A, Blbulyan S, Sahakyan M., Lenz O, Trchounian A. Growth of the facultative chemolithoautotroph *Ralstonia eutropha* on organic waste materials: growth characteristics, redox regulation and hydrogenase activity. *Microb Cell Fact.* 2019; *18*(1): 1-13
2. Reinecke F, Steinbüchel A. *Ralstonia eutropha* strain H16 as model organism for PHA metabolism and for biotechnological production of technically interesting biopolymers. *J Mol Microbiol Biotech.* 2009; *16*(1-2): 91-108.
3. Sang S, Dai H, Hu BX, Hao Y, ZhouT, Zhang J. The Study of Hydrogeochemical Environments and Microbial Communities along a Groundwater Salinity Gradient in the Pearl River Delta, China. *Water.* 2019; *11*(4): 804.
4. Liu J, Chen X, Shu H Y, Lin X R, Zhou Q., Bramryd T et al. Microbial community structure and function in sediments from e-waste contaminated rivers at Guiyu area of China. *Environ Poll.* 2018; *235*: 171-179.
5. Solaun O, Rodríguez JG, Borja A, González M, Saiz-Salinas JI. Biomonitoring of metals under the water framework directive: detecting temporal trends and abrupt changes, in relation to the removal of pollution sources. *Mar Pollut Bull.* 2013; *67*(1-2): 26-35.

6. Campbell BJ, Engel AS, Porter ML, Takai K. The versatile  $\epsilon$ -proteobacteria: key players in sulphidic habitats. *Nat Rev Microbiol*. 2006; 4(6): 458-468.
7. Watanabe T, Miura A, Iwata T, Kojima H, Fukui M. Dominance of *Sulfuritalea* species in nitrate-depleted water of a stratified freshwater lake and arsenate respiration ability within the genus. *Environ Microbiol Rep*. 2017; 9(5): 522-527.
8. Liu JL, Yao J, Duran R, Mihucz VG, Hudson-Edwards KA. Bacterial shifts during in-situ mineralization bio-treatment to non-ferrous metal (loid) tailings. *Environ Pollut*. 2019; 255: 113165.
9. Emerson D, Field E, Chertkov O, Davenport K, Goodwin L, Munk C et al. Comparative genomics of freshwater Fe-oxidizing bacteria: implications for physiology, ecology, and systematics. *Front Microbiol*. 2013; 4, 254.
10. Borruso L, Esposito A, Bani A, Ciccazzo S, Papa M, Zerbe S et al. Ecological diversity of sediment rhizobacteria associated with *Phragmites australis* along a drainage canal in the Yellow River watershed. *J soil sediment*. 2017; 17(1): 253-265.
11. Hernández M, Dumont M G, Yuan Q, Conrad R. Different bacterial populations associated with the roots and rhizosphere of rice incorporate plant-derived carbon. *Appl Environ Microbiol*. 2015; 81(6): 2244-2253.
12. Köchling T, Sanz JL, Galdino L, Florencio L, Kato MT. Impact of pollution on the microbial diversity of a tropical river in an urbanized region of northeastern Brazil. *Int Microbiol*. 2017; 20(1): 11-24.
13. Whiteley AS, Bailey MJ. Bacterial community structure and physiological state within an industrial phenol bioremediation system. *Appl Environ Microbiol*. 2000; 66(6): 2400-2407.
14. Bernardet JF, Segers P, Vancanneyt M, Berthe F, Kersters K, Vandamme P. Cutting a Gordian knot: emended classification and description of the genus *Flavobacterium*, emended description of the family *Flavobacteriaceae*, and proposal of *Flavobacterium hydatis* nom. nov. (basonym, *Cytophaga aquatilis* Strohl and Tait 1978). *Int J Syst Evol Microbiol*. 1996; 46(1): 128-148.
15. Ahmed W, Hughes B, Harwood VJ. Current status of marker genes of *Bacteroides* and related taxa for identifying sewage pollution in environmental waters. *Water*. 2016; 8(6): 231.

16. Sauer E P, VandeWalle JL, Bootsma M J, McLellan SL. Detection of the human specific *Bacteroides* genetic marker provides evidence of widespread sewage contamination of stormwater in the urban environment. *Water Res.* 2011; 45(14):4081-4091.
17. Savichtcheva O, Okayama N, Okabe S. Relationships between *Bacteroides* 16S rRNA genetic markers and presence of bacterial enteric pathogens and conventional fecal indicators. *Water Res.* 2007; 41(16): 3615-3628.
18. Ito T, Yoshiguchi K, Ariesyady HD, Okabe S. Identification of a novel acetate-utilizing bacterium belonging to Synergistes group 4 in anaerobic digester sludge. *ISME J.* 2011; 5(12): 1844.
19. Plugge CM, Balk M, Zoetendal EG, Stams AJ. *Gelria glutamica* gen. nov., sp. nov., a thermophilic, obligately syntrophic, glutamate-degrading anaerobe. *Int J Syst Evol Microbiol.* 2002; 52(2): 401-407.
20. Singh S, Rinta-Kanto JM, Kettunen R, Lens P, Collins G, Kokko M, Rintala J. Acetotrophic Activity Facilitates Methanogenesis from LCFA at Low Temperatures: Screening from Mesophilic Inocula. *Archaea.* 2019.
21. Dugan P R, Stoner D L, Pickrum HM. The Genus *Zoogloea*. *The Prokaryotes: Volume 7: Proteobacteria: Delta, Epsilon Subclass.* 2006; 960-970.
22. Rivière D, Desvignes V, Pelletier E, Chaussonnerie S, Guermazi S, Weissenbach J et al. Towards the definition of a core of microorganisms involved in anaerobic digestion of sludge. *ISME J.* 2009; 3(6): 700.

Table S3. Mean relative abundance (frequencies of reads) and standard deviation per land use measured for the main 52 genera detected.

|       | Land use                                               | Industrial |        | Agricultural |        | Natural Park |        | Urban   |        |
|-------|--------------------------------------------------------|------------|--------|--------------|--------|--------------|--------|---------|--------|
|       |                                                        | Average    | Dev.St | Average      | Dev.St | Average      | Dev.St | Average | Dev.St |
| Genus | Cellvibrio (Proteobacteria)                            | 0.04       | ±0.07  | 0.37         | ±0.82  | 0.02         | ±0.03  | 0       | ±0     |
|       | Lautropia (Proteobacteria)                             | 0.09       | ±0.11  | 0.02         | ±0.05  | 0.05         | ±0.06  | 0.25    | ±0.19  |
|       | [Eubacterium] brachy group (Firmicutes)                | 0.07       | ±0.02  | 0.21         | ±0.16  | 0.12         | ±0.17  | 0.10    | ±0.09  |
|       | Sulfurovum (Proteobacteria)                            | 0.07       | ±0.07  | 0.19         | ±0.17  | 0.04         | ±0.06  | 0.15    | ±0.19  |
|       | Hydrogenophaga (Proteobacteria)                        | 0.16       | ±0.18  | 0.14         | ±0.14  | 0            | ±0     | 0.14    | ±0.22  |
|       | Rhodobacter (Proteobacteria)                           | 0.10       | ±0.07  | 0.18         | ±0.21  | 0.05         | ±0.06  | 0.14    | ±0.15  |
|       | Roseomonas (Proteobacteria)                            | 0.24       | ±0.22  | 0.06         | ±0.07  | 0.05         | ±0.06  | 0.16    | ±0.14  |
|       | Gelria (Firmicutes)                                    | 0.51       | ±0.55  | 0.02         | ±0.02  | 0.08         | ±0.11  | 0.04    | ±0.03  |
|       | Syntrophus (Proteobacteria)                            | 0.21       | ±0.28  | 0.04         | ±0.09  | 0.22         | ±0.25  | 0.18    | ±0.28  |
|       | H16 (Proteobacteria)                                   | 0.19       | ±0.29  | 0.08         | ±0.11  | 0.67         | ±0.72  | 0.02    | ±0.04  |
|       | Bacteroides (Bacteroidetes)                            | 0.24       | ±0.40  | 0.03         | ±0.04  | 0            | ±0     | 0.25    | ±0.13  |
|       | Sulfurimonas (Proteobacteria)                          | 0.11       | ±0.07  | 0.30         | ±0.36  | 0            | ±0     | 0.19    | ±0.17  |
|       | Treponema (Spirochaete)                                | 0.26       | ±0.26  | 0.12         | ±0.16  | 0.43         | ±0.10  | 0.10    | ±0.17  |
|       | [Desulfobacterium] catecholicum group (Proteobacteria) | 0.27       | ±0.42  | 0.16         | ±0.15  | 0.44         | ±0.05  | 0.10    | ±0.10  |
|       | Longilinea (Chloroflexi)                               | 0.36       | ±0.27  | 0.09         | ±0.11  | 0.04         | ±0     | 0.24    | ±0.30  |
|       | Massilia (Proteobacteria)                              | 0.01       | ±0.02  | 0.31         | ±0.55  | 0.06         | ±0.08  | 0.31    | ±0.11  |
|       | Feritrophicum (Proteobacteria)                         | 0.06       | ±0.09  | 0.52         | ±0.58  | 0.18         | ±0.14  | 0.11    | ±0.14  |
|       | Erysipelothrix (Firmicutes)                            | 0.32       | ±0.24  | 0.41         | ±0.18  | 0.12         | ±0.11  | 0.08    | ±0.12  |
|       | Anaerovorax (Firmicutes)                               | 0.38       | ±0.06  | 0.27         | ±0.22  | 0.08         | ±0.11  | 0.21    | ±0.26  |
|       | Blvii28 wastewater-sludge group (Bacteroidota)         | 0.26       | ±0.12  | 0.38         | ±0.32  | 0.39         | ±0.11  | 0.10    | ±0.09  |
|       | Actibacter (Bacteroidetes)                             | 0          | ±0     | 0.02         | ±0.03  | 0.12         | ±0.05  | 0.68    | ±1.38  |
|       | Sideroxydans (Proteobacteria)                          | 0.10       | ±0.15  | 0.52         | ±0.51  | 0.22         | ±0.20  | 0.19    | ±0.18  |
|       | Algoriphagus (Bacteroidetes)                           | 0.23       | ±0.43  | 0.26         | ±0.29  | 0.13         | ±0.13  | 0.35    | ±0.75  |
|       | Altererythrobacter (Proteobacteria)                    | 0.13       | ±0.12  | 0.49         | ±0.61  | 0.05         | ±0.06  | 0.27    | ±0.63  |
|       | Microbacter (Bacteroidetes)                            | 0.08       | ±0.12  | 0.64         | ±0.57  | 0.02         | ±0.03  | 0.26    | ±0.19  |

|                                                   |      |       |      |       |      |       |      |        |
|---------------------------------------------------|------|-------|------|-------|------|-------|------|--------|
| Paludibacter (Bacteroidetes)                      | 0.30 | ±0.03 | 0.41 | ±0.14 | 0.07 | ±0.10 | 0.37 | ±0.19  |
| vadinBC27 wastewater-sludge group (Bacteroidetes) | 0.32 | ±0.14 | 0.37 | ±0.27 | 0.19 | ±0.11 | 0.42 | ±0.24  |
| Brevundimonas (Proteobacteria)                    | 0.15 | ±0.13 | 0.46 | ±1.00 | 0.06 | ±0.08 | 0.51 | ±0.59  |
| BD1-7 clade (Proteobacteria)                      | 0.01 | ±0.02 | 0.27 | ±0.23 | 0.02 | ±0.03 | 0.83 | ±0.92  |
| Geobacter (Proteobacteria)                        | 0.49 | ±0.58 | 0.27 | ±0.24 | 0.55 | ±0.06 | 0.33 | ±0.48  |
| Zoogloea (Proteobacteria)                         | 0    | ±0    | 0.78 | ±0.68 | 0.14 | ±0.19 | 0.40 | ±0.58  |
| Propionivibrio (Proteobacteria)                   | 0.22 | ±0.08 | 0.49 | ±0.24 | 0.24 | ±0.11 | 0.47 | ±0.73  |
| Anaerolinea (Chloroflexi)                         | 1.04 | ±1.00 | 0.10 | ±0.11 | 0.77 | ±0.20 | 0.10 | ±0.13  |
| Leptolinea (Chloroflexi)                          | 0.80 | ±0.49 | 0.10 | ±0.06 | 0.44 | ±0.55 | 0.48 | ±0.31  |
| Desulfocapsa (Proteobacteria)                     | 0.05 | ±0.06 | 0.30 | ±0.22 | 0.08 | ±0.01 | 1.01 | ±1.18  |
| Thermomonas (Proteobacteria)                      | 0.04 | ±0.05 | 0.23 | ±0.29 | 0    | ±0    | 1.15 | ±1.40  |
| Christensenellaceae R-7 group (Firmicutes)        | 1.08 | ±0.57 | 0.31 | ±0.23 | 0    | ±0    | 0.55 | ±0.75  |
| Pseudomonas (Proteobacteria)                      | 0.44 | ±0.27 | 1.49 | ±3.11 | 0    | ±0    | 0.25 | ±0.19  |
| BSV13 (Proteobacteria)                            | 0.21 | ±0.12 | 0.33 | ±0.16 | 0.06 | ±0.02 | 1.41 | ±2.94  |
| Sulfuritalea (Proteobacteria)                     | 0.22 | ±0.19 | 1.48 | ±1.13 | 0.61 | ±0.48 | 0.38 | ±0.35  |
| Smithella (Proteobacteria)                        | 0.36 | ±0.39 | 0.14 | ±0.17 | 0.16 | ±0.22 | 1.64 | ±2.49  |
| Trichococcus (Proteobacteria)                     | 1.42 | ±1.92 | 0.82 | ±0.72 | 0    | ±0    | 0.49 | ±0.41  |
| Arenimonas (Proteobacteria)                       | 0.30 | ±0.39 | 1.27 | ±0.75 | 0    | ±0    | 0.88 | ±0.58  |
| Desulfobacter (Proteobacteria)                    | 0.63 | ±0.34 | 1.42 | ±1.53 | 0    | ±0    | 0.68 | ±0.54  |
| Desulfobulbus (Proteobacteria)                    | 0.67 | ±0.28 | 1.37 | ±0.59 | 1.62 | ±0.82 | 0.64 | ±0.61  |
| Candidatus Accumulibacter (Proteobacter)          | 0.13 | ±0.16 | 2.02 | ±0.93 | 0.29 | ±0.30 | 1.40 | ±1.95  |
| Opitutus (Verrucomicrobia)                        | 0.54 | ±0.41 | 2.01 | ±0.99 | 4.32 | ±1.77 | 0.17 | ±0.21  |
| Dechloromonas (Proteobacteria)                    | 0.21 | ±0.38 | 2.92 | ±1.33 | 0.44 | ±0.55 | 2.05 | ±1.63  |
| Thiobacillus (Proteobacteria)                     | 3.05 | ±3.09 | 1.17 | ±0.49 | 1.02 | ±0.10 | 2.62 | ±2.12  |
| Thauera (Proteobacteria)                          | 0.47 | ±0.50 | 2.85 | ±2.02 | 0    | ±0    | 3.50 | ±2.94  |
| Flavobacterium (Bacteroidetes)                    | 0.88 | ±1.10 | 4.86 | ±7.52 | 0.33 | ±0.09 | 1.95 | ±0.86  |
| Sulfuricurvum (Proteobacteria)                    | 0.35 | ±0.21 | 0.30 | ±0.26 | 0.23 | ±0.01 | 8.79 | ±12.53 |
